# Supplementary material for: Interrogation of mirror-image l-RNA–protein interactions reveals key mechanisms of single-stranded G-rich l-RNA cytotoxicity and a potential mitigation strategy
Source: Royal Society of Chemistry journal article supplement (doi:10.1039/d5sc00596e), 2025-01-01
Supplement: d5sc00596e1.xlsx [file d5sc00596e1.xlsx]

## Sheet: Lr(GA)20 vs Lr(GCGC)
Gene label	log2FC	P.Value	adj.P.Val	Protein.names	Enrichment
G3BP1	5.4893	0.0016738	0.0043859	Ras GTPase-activating protein-binding protein 1	Up
BCLAF1	5.0675	0.000826094	0.00262035	Bcl-2-associated transcription factor 1	Up
FUS	5.00605	0.0020702	0.00512915	RNA-binding protein FUS	Up
PRRC2C	4.97924	0.0121867	0.0215212	Protein PRRC2C	Up
CAPRIN1	4.95836	5.79e-05	0.000431937	Caprin-1	Up
HNRNPR	4.84274	0.000308633	0.00134824	Heterogeneous nuclear ribonucleoprotein R	Up
THRAP3	4.82406	0.000332165	0.00140799	Thyroid hormone receptor-associated protein 3	Up
ALYREF	4.72234	0.00470487	0.00990109	THO complex subunit 4	Up
HNRNPU	4.60135	7.25e-05	0.000481472	Heterogeneous nuclear ribonucleoprotein U	Up
RBMX	4.36802	6.45e-08	2.6e-05	RNA-binding motif protein, X chromosome;RNA-binding motif protein, X chromosome, N-terminally processed	Up
CIRBP	4.12062	0.00102455	0.00301908	Cold-inducible RNA-binding protein	Up
p53nrb(NONO)	3.8859	0.00088837	0.00274788	Non-POU domain-containing octamer-binding protein	Up
DDX5	3.88137	1.31e-05	0.000197564	Probable ATP-dependent RNA helicase DDX5	Up
HNRNPM	3.86226	5.15e-06	0.000142567	Heterogeneous nuclear ribonucleoprotein M	Up
ERH	3.84743	2.09e-07	2.6e-05	Enhancer of rudimentary homolog	Up
CPSF1	3.80039	0.00250027	0.0059292	Cleavage and polyadenylation specificity factor subunit 1	Up
TAF15	3.74801	2.35e-05	0.000252112	TATA-binding protein-associated factor 2N	Up
SFPQ	3.64375	2.19e-05	0.000249097	Splicing factor, proline- and glutamine-rich	Up
EWSR1	3.41904	5.18e-05	0.000409789	RNA-binding protein EWS	Up
DDX3X;DDX3Y	3.28014	0.000109986	0.000583942	ATP-dependent RNA helicase DDX3X;ATP-dependent RNA helicase DDX3Y	Up
FIP1L1	3.20976	1.39e-07	2.6e-05	Pre-mRNA 3-end-processing factor FIP1	Up
G3BP2	3.19561	1.96e-07	2.6e-05	Ras GTPase-activating protein-binding protein 2	Up
DHX9	3.15257	3.67e-07	3.62e-05	ATP-dependent RNA helicase A	Up
HNRNPA2B1	3.09528	1.44e-05	0.000200316	Heterogeneous nuclear ribonucleoproteins A2/B1	Up
SCAF11	3.07547	1.23e-06	5.59e-05	Protein SCAF11	Up
CPSF3	2.91037	6.27e-05	0.000443605	Cleavage and polyadenylation specificity factor subunit 3	Up
PABPN1	2.89558	4.68e-06	0.00013705	Polyadenylate-binding protein 2	Up
NCL	2.84998	0.000163424	0.000791849	Nucleolin	Up
POLDIP3	2.72795	3.05e-06	0.000108554	Polymerase delta-interacting protein 3	Up
PRRC2A	2.69201	0.000379312	0.00153575	Protein PRRC2A	Up
DHX36	2.68091	2.84e-05	0.000277099	ATP-dependent RNA helicase DHX36	Up
FMR1	2.67787	7.47e-07	5.31e-05	Fragile X mental retardation protein 1	Up
RBM15	2.65052	8.31e-06	0.000179929	Putative RNA-binding protein 15	Up
HNRNPA0	2.59963	7.62e-06	0.000179929	Heterogeneous nuclear ribonucleoprotein A0	Up
ILF2	2.55984	6.7e-06	0.000166862	Interleukin enhancer-binding factor 2	Up
LSM14A	2.52427	0.000123206	0.000619763	Protein LSM14 homolog A	Up
HNRNPD	2.52298	2.51e-06	9.61e-05	Heterogeneous nuclear ribonucleoprotein D0	Up
HNRNPL	2.50976	0.00221634	0.00546405	Heterogeneous nuclear ribonucleoprotein L	Up
HNRNPA1;HNRNPA1L2	2.45751	1.11e-05	0.000184597	Heterogeneous nuclear ribonucleoprotein A1;Heterogeneous nuclear ribonucleoprotein A1, N-terminally processed;Heterogeneous nuclear ribonucleoprotein A1-like 2	Up
WDR33	2.45623	1.21e-05	0.000188548	pre-mRNA 3 end processing protein WDR33	Up
EIF2S2	2.45427	3.88e-05	0.000341394	Eukaryotic translation initiation factor 2 subunit 2	Up
ILF3	2.41463	0.000451891	0.00171788	Interleukin enhancer-binding factor 3	Up
SERBP1	2.40639	0.00012259	0.000619763	Plasminogen activator inhibitor 1 RNA-binding protein	Up
NXF1	2.37428	1.59e-06	6.58e-05	Nuclear RNA export factor 1	Up
GTF2I	2.37335	3.28e-05	0.000310682	General transcription factor II-I	Up
EIF2S3;EIF2S3L	2.36992	9.74e-06	0.000184597	Eukaryotic translation initiation factor 2 subunit 3;Putative eukaryotic translation initiation factor 2 subunit 3-like protein	Up
TFAM	2.35089	1.24e-06	5.59e-05	Transcription factor A, mitochondrial	Up
RTCB	2.32123	4.37e-07	3.62e-05	tRNA-splicing ligase RtcB homolog	Up
EIF2S1	2.26559	5.28e-05	0.000411188	Eukaryotic translation initiation factor 2 subunit 1	Up
CPSF2	2.26071	1.22e-06	5.59e-05	Cleavage and polyadenylation specificity factor subunit 2	Up
MTPAP	2.25724	1.72e-05	0.00020891	Poly(A) RNA polymerase, mitochondrial	Up
C14orf166	2.2554	0.000460027	0.00171922	UPF0568 protein C14orf166	Up
HNRNPA3	2.24264	0.000267548	0.00118963	Heterogeneous nuclear ribonucleoprotein A3	Up
SYNCRIP	2.23404	1.51e-05	0.000200316	Heterogeneous nuclear ribonucleoprotein Q	Up
NOL6	2.20678	2.74e-05	0.000273184	Nucleolar protein 6	Up
FXR1	2.19421	2.43e-05	0.000252112	Fragile X mental retardation syndrome-related protein 1	Up
HNRNPUL2	2.11733	6.93e-05	0.00047237	Heterogeneous nuclear ribonucleoprotein U-like protein 2	Up
PURA	2.11043	3.95e-05	0.000341394	Transcriptional activator protein Pur-alpha	Up
DDX17	2.06593	1.22e-06	5.59e-05	Probable ATP-dependent RNA helicase DDX17	Up
RBM14	2.06591	2.29e-05	0.000252112	RNA-binding protein 14	Up
PPHLN1	2.06099	0.000435915	0.001681	Periphilin-1	Up
ZC3H4	2.05808	0.00101814	0.00301805	Zinc finger CCCH domain-containing protein 4	Up
UBAP2L	2.03063	9.28e-05	0.000542272	Ubiquitin-associated protein 2-like	Up
WDR36	1.96947	4.31e-06	0.000137021	WD repeat-containing protein 36	Up
RPL11	1.95622	3.39e-05	0.000312438	60S ribosomal protein L11	Up
KIAA1429	1.92681	0.000460412	0.00171922	Protein virilizer homolog	Up
WTAP	1.92372	0.000583372	0.00200358	Pre-mRNA-splicing regulator WTAP	Up
UTP18	1.90412	4.57e-05	0.000385875	U3 small nucleolar RNA-associated protein 18 homolog	Up
DDX1	1.89575	1.01e-05	0.000184597	ATP-dependent RNA helicase DDX1	Up
ZNF768	1.89058	3.97e-05	0.000341394	Zinc finger protein 768	Up
MEPCE	1.86896	1.68e-05	0.00020891	7SK snRNA methylphosphate capping enzyme	Up
RBM15B	1.86395	9.42e-05	0.000542272	Putative RNA-binding protein 15B	Up
RRP7A	1.86392	0.000340859	0.00141457	Ribosomal RNA-processing protein 7 homolog A	Up
YBX1	1.84214	0.00167109	0.0043859	Nuclease-sensitive element-binding protein 1	Up
RBM27	1.83036	1.97e-05	0.000234056	RNA-binding protein 27	Up
MAP7	1.81305	1.17e-05	0.00018834	Ensconsin	Up
KHDRBS1	1.7721	1.51e-05	0.000200316	KH domain-containing, RNA-binding, signal transduction-associated protein 1	Up
ZC3H13	1.7399	0.000171929	0.000815435	Zinc finger CCCH domain-containing protein 13	Up
RAE1	1.6916	0.000688413	0.00225068	mRNA export factor	Up
EXOSC10	1.67612	2.2e-05	0.000249097	Exosome component 10	Up
TBL3	1.65254	8.87e-06	0.000184104	Transducin beta-like protein 3	Up
TSR1	1.61833	1.11e-05	0.000184597	Pre-rRNA-processing protein TSR1 homolog	Up
CHTOP	1.59301	7.96e-06	0.000179929	Chromatin target of PRMT1 protein	Up
ARID1A	1.59132	0.043891	0.0640988	AT-rich interactive domain-containing protein 1A	Not Significant
POLRMT	1.56443	0.00121526	0.00338101	DNA-directed RNA polymerase, mitochondrial	Up
MBD2	1.5237	1.09e-05	0.000184597	Methyl-CpG-binding domain protein 2	Up
HNRNPH1	1.50282	0.000287847	0.00126856	Heterogeneous nuclear ribonucleoprotein H;Heterogeneous nuclear ribonucleoprotein H, N-terminally processed	Up
PWP2	1.49827	5.81e-05	0.000431937	Periodic tryptophan protein 2 homolog	Not Significant
GTF3C3	1.49309	4.4e-06	0.000137021	General transcription factor 3C polypeptide 3	Not Significant
GTF3C1	1.47627	1.71e-05	0.00020891	General transcription factor 3C polypeptide 1	Not Significant
ZC3H14	1.47429	0.00287951	0.00660828	Zinc finger CCCH domain-containing protein 14	Not Significant
CPSF4	1.45041	0.000194627	0.000881132	Cleavage and polyadenylation specificity factor subunit 4	Not Significant
RPS19	1.42981	8.55e-05	0.000525938	40S ribosomal protein S19	Not Significant
THAP11	1.42353	0.000110222	0.000583942	THAP domain-containing protein 11	Not Significant
GTF3C5	1.38201	6.44e-06	0.000166862	General transcription factor 3C polypeptide 5	Not Significant
FAM120A	1.37204	0.00164916	0.00436851	Constitutive coactivator of PPAR-gamma-like protein 1	Not Significant
ZC3H11A	1.35629	0.000502302	0.00181266	Zinc finger CCCH domain-containing protein 11A	Not Significant
GTF3C4	1.35029	1.06e-05	0.000184597	General transcription factor 3C polypeptide 4	Not Significant
TDRD3	1.34408	0.0146971	0.0252384	Tudor domain-containing protein 3	Not Significant
UPF3B	1.31888	2.49e-05	0.000253352	Regulator of nonsense transcripts 3B	Not Significant
PCF11	1.29966	8.74e-05	0.000530642	Pre-mRNA cleavage complex 2 protein Pcf11	Not Significant
GTF3C2	1.29165	1.47e-05	0.000200316	General transcription factor 3C polypeptide 2	Not Significant
MPHOSPH8	1.28725	0.000353415	0.00145455	M-phase phosphoprotein 8	Not Significant
FAM98A	1.24121	0.0196268	0.0317343	Protein FAM98A	Not Significant
DDX50	1.22517	5.53e-05	0.000423889	ATP-dependent RNA helicase DDX50	Not Significant
GATAD2A	1.20518	1.53e-05	0.000200316	Transcriptional repressor p66-alpha	Not Significant
PLRG1	1.19867	6.41e-05	0.000443605	Pleiotropic regulator 1	Not Significant
MTA2	1.18166	9.57e-05	0.000542272	Metastasis-associated protein MTA2	Not Significant
PLEC	1.16241	0.000339998	0.00141457	Plectin	Not Significant
SF3B1	1.15145	0.00486277	0.0100812	Splicing factor 3B subunit 1	Not Significant
GAR1	1.14594	6.41e-05	0.000443605	H/ACA ribonucleoprotein complex subunit 1	Not Significant
FAM208A	1.13137	0.000181893	0.000854553	Protein FAM208A	Not Significant
AP2A1	1.12481	8.25e-05	0.000525938	AP-2 complex subunit alpha-1	Not Significant
PRPF19	1.11613	0.000105016	0.000568459	Pre-mRNA-processing factor 19	Not Significant
AP2B1	1.1134	2.39e-05	0.000252112	AP-2 complex subunit beta	Not Significant
CBX8	1.11324	0.000103459	0.000566184	Chromobox protein homolog 8	Not Significant
CDC5L	1.106	8.5e-05	0.000525938	Cell division cycle 5-like protein	Not Significant
POLR1C	1.09153	0.000883849	0.00274788	DNA-directed RNA polymerases I and III subunit RPAC1	Not Significant
NHP2	1.09112	4.81e-05	0.000386067	H/ACA ribonucleoprotein complex subunit 2	Not Significant
THOC6	1.08574	4.74e-05	0.000386067	THO complex subunit 6 homolog	Not Significant
HLTF	1.07989	0.0017756	0.00455117	Helicase-like transcription factor	Not Significant
MTDH	1.07808	0.000136777	0.00068115	Protein LYRIC	Not Significant
DKC1	1.06363	0.000101725	0.00056288	H/ACA ribonucleoprotein complex subunit 4	Not Significant
AP2M1	1.06342	6.01e-05	0.000439818	AP-2 complex subunit mu	Not Significant
THOC1	1.06204	3.98e-05	0.000341394	THO complex subunit 1	Not Significant
BCAS2	1.05919	0.000664661	0.00219206	Pre-mRNA-splicing factor SPF27	Not Significant
POLR1A	1.05393	0.000425018	0.00166661	DNA-directed RNA polymerase I subunit RPA1	Not Significant
COIL	1.04825	0.000530615	0.00188747	Coilin	Not Significant
RPS10	1.03841	0.000438816	0.001681	40S ribosomal protein S10	Not Significant
PARP1	1.03609	0.000122273	0.000619763	Poly [ADP-ribose] polymerase 1	Not Significant
RING1	1.03044	0.000112151	0.000587909	E3 ubiquitin-protein ligase RING1	Not Significant
MTA1	1.00433	0.00121453	0.00338101	Metastasis-associated protein MTA1	Not Significant
NUP153	1.00213	0.000100991	0.00056288	Nuclear pore complex protein Nup153	Not Significant
PABPC1	1.00058	0.00326077	0.00734781	Polyadenylate-binding protein 1	Not Significant
POLR1B	0.995952	0.000593115	0.00202309	DNA-directed RNA polymerase I subunit RPA2	Not Significant
SF3B3	0.995391	0.00229621	0.00557812	Splicing factor 3B subunit 3	Not Significant
WDR3	0.994859	3.31e-05	0.000310682	WD repeat-containing protein 3	Not Significant
PABPC4	0.990071	0.0195568	0.0317241	Polyadenylate-binding protein 4	Not Significant
DDX39A;DDX39B	0.98667	0.000319151	0.00137015	ATP-dependent RNA helicase DDX39A;Spliceosome RNA helicase DDX39B	Not Significant
DDX41	0.985951	0.000163776	0.000791849	Probable ATP-dependent RNA helicase DDX41	Not Significant
FBL	0.955091	7.89e-05	0.000517165	rRNA 2-O-methyltransferase fibrillarin	Not Significant
POLR2E	0.954329	0.00258614	0.00610379	DNA-directed RNA polymerases I, II, and III subunit RPABC1	Not Significant
FARSA	0.932406	9.58e-05	0.000542272	Phenylalanine--tRNA ligase alpha subunit	Not Significant
RBM39	0.931975	0.000824543	0.00262035	RNA-binding protein 39	Not Significant
ASPH	0.918565	6.35e-05	0.000443605	Aspartyl/asparaginyl beta-hydroxylase	Not Significant
RPS3	0.896662	0.000617555	0.00209043	40S ribosomal protein S3	Not Significant
THOC5	0.875084	0.000434264	0.001681	THO complex subunit 5 homolog	Not Significant
ZNF638	0.86429	0.00016667	0.000798093	Zinc finger protein 638	Not Significant
WDR76	0.837177	0.000187938	0.000873429	WD repeat-containing protein 76	Not Significant
XPC	0.826626	8.86e-05	0.000531486	DNA repair protein complementing XP-C cells	Not Significant
CBX4	0.815192	0.0034983	0.00781234	E3 SUMO-protein ligase CBX4	Not Significant
RPS7	0.813379	0.000113775	0.000590208	40S ribosomal protein S7	Not Significant
POM121C;POM121	0.810295	0.000900687	0.00275857	Nuclear envelope pore membrane protein POM 121C;Nuclear envelope pore membrane protein POM 121	Not Significant
MAZ	0.793051	0.00389755	0.00850166	Myc-associated zinc finger protein	Not Significant
RBBP7	0.77782	0.000189419	0.000873429	Histone-binding protein RBBP7	Not Significant
HSPD1	0.772318	0.000658037	0.00218468	60 kDa heat shock protein, mitochondrial	Not Significant
SF3B2	0.771986	0.0024856	0.00592263	Splicing factor 3B subunit 2	Not Significant
DDX55	0.734727	0.000390474	0.0015616	ATP-dependent RNA helicase DDX55	Not Significant
RBBP6	0.731314	0.00134231	0.00367291	E3 ubiquitin-protein ligase RBBP6	Not Significant
RBBP4	0.724958	0.00015623	0.000770321	Histone-binding protein RBBP4	Not Significant
ZFC3H1	0.724537	0.000191172	0.000873429	Zinc finger C3H1 domain-containing protein	Not Significant
WDR82	0.722106	0.00484473	0.0100812	WD repeat-containing protein 82	Not Significant
POLR1E	0.712443	0.00198128	0.00495818	DNA-directed RNA polymerase I subunit RPA49	Not Significant
GATAD2B	0.707048	0.000257754	0.00115641	Transcriptional repressor p66-beta	Not Significant
RACGAP1	0.696015	0.00468259	0.00990109	Rac GTPase-activating protein 1	Not Significant
THOC2	0.695505	0.000313068	0.00135572	THO complex subunit 2	Not Significant
SKIV2L2	0.692511	0.00358341	0.00796668	Superkiller viralicidic activity 2-like 2	Not Significant
IFI16	0.673566	0.00449427	0.00968896	Gamma-interferon-inducible protein 16	Not Significant
ATAD3B	0.669824	0.0188624	0.0306976	ATPase family AAA domain-containing protein 3B	Not Significant
SRP14	0.6643	0.000580141	0.00200358	Signal recognition particle 14 kDa protein	Not Significant
RPS15A	0.65722	0.000373685	0.00152537	40S ribosomal protein S15a	Not Significant
NUSAP1	0.653997	0.000902905	0.00275857	Nucleolar and spindle-associated protein 1	Not Significant
RPS5	0.635775	0.00642758	0.0127527	40S ribosomal protein S5;40S ribosomal protein S5, N-terminally processed	Not Significant
DDX47	0.619202	0.000479683	0.00175648	Probable ATP-dependent RNA helicase DDX47	Not Significant
HDAC2	0.616521	0.000621252	0.00209043	Histone deacetylase 2	Not Significant
HMG20A	0.612235	0.00464831	0.00990109	High mobility group protein 20A	Not Significant
CD3EAP	0.611913	0.00147598	0.00399478	DNA-directed RNA polymerase I subunit RPA34	Not Significant
PHF14	0.608	0.00279638	0.00648183	PHD finger protein 14	Not Significant
DEK	0.59762	0.0174161	0.0290971	Protein DEK	Not Significant
RPL9	0.594862	0.00487865	0.0100812	60S ribosomal protein L9	Not Significant
PSIP1	0.592044	0.000956639	0.00288731	PC4 and SFRS1-interacting protein	Not Significant
TRIP12	0.586228	0.000656786	0.00218468	E3 ubiquitin-protein ligase TRIP12	Not Significant
CHD4	0.585808	0.00117558	0.00334536	Chromodomain-helicase-DNA-binding protein 4	Not Significant
VEZF1	0.57327	0.0011344	0.00326549	Vascular endothelial zinc finger 1	Not Significant
THOC3	0.561019	0.00179122	0.00455117	THO complex subunit 3	Not Significant
DHX15	0.539224	0.000977436	0.00291475	Pre-mRNA-splicing factor ATP-dependent RNA helicase DHX15	Not Significant
BUD13	0.517571	0.00767057	0.0144871	BUD13 homolog	Not Significant
TPX2	0.495464	0.0302242	0.0464557	Targeting protein for Xklp2	Not Significant
IQGAP1	0.486069	0.0538031	0.0763361	Ras GTPase-activating-like protein IQGAP1	Not Significant
UBTF	0.48076	0.00125954	0.00348472	Nucleolar transcription factor 1	Not Significant
HNRNPC	0.48042	0.018214	0.0298374	Heterogeneous nuclear ribonucleoproteins C1/C2	Not Significant
C9orf114	0.467986	0.00226349	0.00555281	Putative methyltransferase C9orf114	Not Significant
UTP14A	0.452231	0.00243143	0.00582141	U3 small nucleolar RNA-associated protein 14 homolog A	Not Significant
PHF6	0.449407	0.00382879	0.00839972	PHD finger protein 6	Not Significant
LRRC59	0.441557	0.0111082	0.0198988	Leucine-rich repeat-containing protein 59	Not Significant
HDAC1	0.437742	0.0216184	0.0342875	Histone deacetylase 1	Not Significant
RPS2	0.435759	0.0178618	0.0295347	40S ribosomal protein S2	Not Significant
ATAD3A	0.429831	0.00995451	0.0180925	ATPase family AAA domain-containing protein 3A	Not Significant
INTS6	0.424647	0.01561	0.0266225	Integrator complex subunit 6	Not Significant
HSPA5	0.421821	0.0218148	0.0343774	78 kDa glucose-regulated protein	Not Significant
RPS17	0.408902	0.006522	0.0127861	40S ribosomal protein S17	Not Significant
TMPO	0.406371	0.0157894	0.0268365	Lamina-associated polypeptide 2, isoform alpha;Thymopoietin;Thymopentin	Not Significant
SENP1	0.39932	0.0338235	0.051354	Sentrin-specific protease 1	Not Significant
RAN	0.397099	0.0162649	0.0275507	GTP-binding nuclear protein Ran	Not Significant
RNPC3	0.37843	0.614855	0.65567	RNA-binding protein 40	Not Significant
DIMT1	0.377304	0.0515155	0.0735093	Probable dimethyladenosine transferase	Not Significant
KIF2A	0.372172	0.0482685	0.0694731	Kinesin-like protein KIF2A	Not Significant
KRAS;HRAS;NRAS	0.366221	0.00705126	0.0136522	GTPase KRas;GTPase KRas, N-terminally processed;GTPase HRas;GTPase HRas, N-terminally processed;GTPase NRas	Not Significant
IK	0.363783	0.107576	0.138789	Protein Red	Not Significant
HELLS	0.362817	0.0318871	0.0487109	Lymphoid-specific helicase	Not Significant
AKAP17A	0.352494	0.0118126	0.0209349	A-kinase anchor protein 17A	Not Significant
SLC2A1	0.348239	0.178002	0.22106	Solute carrier family 2, facilitated glucose transporter member 1	Not Significant
THOC7	0.345532	0.342399	0.390193	THO complex subunit 7 homolog	Not Significant
MATR3	0.342896	0.0490499	0.0703943	Matrin-3	Not Significant
CHD7	0.337547	0.00647055	0.012771	Chromodomain-helicase-DNA-binding protein 7	Not Significant
PDLIM7	0.333839	0.0950347	0.123814	PDZ and LIM domain protein 7	Not Significant
EIF5B	0.331783	0.0537783	0.0763361	Eukaryotic translation initiation factor 5B	Not Significant
RRP1	0.331544	0.0397383	0.0583766	Ribosomal RNA processing protein 1 homolog A	Not Significant
VIM	0.330412	0.1426	0.179331	Vimentin	Not Significant
PHF3	0.323271	0.00863581	0.0159457	PHD finger protein 3	Not Significant
ZFP91	0.322675	0.0168939	0.0284229	E3 ubiquitin-protein ligase ZFP91	Not Significant
NUMA1	0.313164	0.00839425	0.0157036	Nuclear mitotic apparatus protein 1	Not Significant
CKAP4	0.307642	0.0180677	0.0296955	Cytoskeleton-associated protein 4	Not Significant
KIF22	0.306687	0.0563161	0.0796745	Kinesin-like protein KIF22	Not Significant
BAZ1A	0.305715	0.0480053	0.0692946	Bromodomain adjacent to zinc finger domain protein 1A	Not Significant
EEF1A1;EEF1A1P5;EEF1A2	0.303847	0.0952228	0.123814	Elongation factor 1-alpha 1;Putative elongation factor 1-alpha-like 3;Elongation factor 1-alpha 2	Not Significant
POLR2A	0.299532	0.184588	0.228102	DNA-directed RNA polymerase II subunit RPB1	Not Significant
SMARCA4	0.285899	0.0276588	0.0426442	Transcription activator BRG1	Not Significant
WHSC1	0.285037	0.0344076	0.052082	Histone-lysine N-methyltransferase NSD2	Not Significant
FEN1	0.274921	0.0586783	0.082315	Flap endonuclease 1	Not Significant
SLTM	0.274687	0.706369	0.737106	SAFB-like transcription modulator	Not Significant
UBA52;RPS27A;UBB;UBC	0.268026	0.0775901	0.104151	Ubiquitin-60S ribosomal protein L40;Ubiquitin;60S ribosomal protein L40;Ubiquitin-40S ribosomal protein S27a;Ubiquitin;40S ribosomal protein S27a;Polyubiquitin-B;Ubiquitin;Polyubiquitin-C;Ubiquitin	Not Significant
MCM7	0.243076	0.133089	0.168647	DNA replication licensing factor MCM7	Not Significant
ELMSAN1	0.233744	0.0737585	0.0999285	ELM2 and SANT domain-containing protein 1	Not Significant
ADNP	0.233548	0.157967	0.197162	Activity-dependent neuroprotector homeobox protein	Not Significant
HNRNPF	0.232173	0.0931291	0.122048	Heterogeneous nuclear ribonucleoprotein F;Heterogeneous nuclear ribonucleoprotein F, N-terminally processed	Not Significant
HSPA1B;HSPA1A	0.230522	0.0304058	0.0465911	Heat shock 70 kDa protein 1B;Heat shock 70 kDa protein 1A	Not Significant
SMC2	0.228365	0.340565	0.388994	Structural maintenance of chromosomes protein 2	Not Significant
HIST1H4A	0.226154	0.0581199	0.0819936	Histone H4	Not Significant
HSPB1	0.22163	0.0992787	0.128418	Heat shock protein beta-1	Not Significant
TBL2	0.219839	0.0738427	0.0999285	Transducin beta-like protein 2	Not Significant
HSPA8	0.212339	0.0368786	0.0548539	Heat shock cognate 71 kDa protein	Not Significant
NOL7	0.197787	0.130262	0.165486	Nucleolar protein 7	Not Significant
PRPF3	0.196053	0.420448	0.465296	U4/U6 small nuclear ribonucleoprotein Prp3	Not Significant
PNO1	0.19365	0.375573	0.423289	RNA-binding protein PNO1	Not Significant
CGGBP1	0.189528	0.281798	0.33098	CGG triplet repeat-binding protein 1	Not Significant
DHX37	0.187672	0.124628	0.15914	Probable ATP-dependent RNA helicase DHX37	Not Significant
RPS20	0.185088	0.186332	0.229119	40S ribosomal protein S20	Not Significant
WDR46	0.183891	0.0781588	0.104632	WD repeat-containing protein 46	Not Significant
CTCF	0.167881	0.154756	0.194127	Transcriptional repressor CTCF	Not Significant
POLR2H	0.166462	0.454714	0.497687	DNA-directed RNA polymerases I, II, and III subunit RPABC3	Not Significant
KNOP1	0.163043	0.32223	0.369748	Lysine-rich nucleolar protein 1	Not Significant
XRN2	0.149515	0.656399	0.694027	5-3 exoribonuclease 2	Not Significant
RPL23A	0.143306	0.594143	0.636308	60S ribosomal protein L23a	Not Significant
DDX54	0.143276	0.140024	0.176536	ATP-dependent RNA helicase DDX54	Not Significant
TCOF1	0.13912	0.270667	0.319413	Treacle protein	Not Significant
WHSC1L1	0.134778	0.321228	0.369449	Histone-lysine N-methyltransferase NSD3	Not Significant
POP4	0.133447	0.190754	0.233404	Ribonuclease P protein subunit p29	Not Significant
WIZ	0.131829	0.241989	0.288994	Protein Wiz	Not Significant
RPS16	0.130223	0.281239	0.33098	40S ribosomal protein S16	Not Significant
ABCF2	0.128599	0.384255	0.429056	ATP-binding cassette sub-family F member 2	Not Significant
UTP11L	0.124851	0.414631	0.459881	Probable U3 small nucleolar RNA-associated protein 11	Not Significant
SCAF1	0.123923	0.361629	0.410231	Splicing factor, arginine/serine-rich 19	Not Significant
RPL36AL;RPL36A	0.120263	0.205167	0.248597	60S ribosomal protein L36a-like;60S ribosomal protein L36a	Not Significant
HIST2H3A;HIST3H3;H3F3A;HIST1H3A;HIST2H3PS2;H3F3C	0.118894	0.181281	0.224572	Histone H3.2;Histone H3.1t;Histone H3.3;Histone H3.1;Histone H3;Histone H3.3C	Not Significant
TUBA1B	0.117568	0.266676	0.316201	Tubulin alpha-1B chain	Not Significant
RPS18	0.116725	0.305561	0.356369	40S ribosomal protein S18	Not Significant
DIDO1	0.109391	0.421699	0.465645	Death-inducer obliterator 1	Not Significant
TAF5	0.106645	0.27047	0.319413	Transcription initiation factor TFIID subunit 5	Not Significant
NOL10	0.0986902	0.254198	0.302125	Nucleolar protein 10	Not Significant
CDCA7L	0.0955386	0.3761	0.423289	Cell division cycle-associated 7-like protein	Not Significant
RPL21	0.0739868	0.396841	0.441132	60S ribosomal protein L21	Not Significant
SMC3	0.07251	0.793325	0.819659	Structural maintenance of chromosomes protein 3	Not Significant
ZNF384	0.068027	0.568656	0.611643	Zinc finger protein 384	Not Significant
SLC25A5	0.0594259	0.609598	0.651459	ADP/ATP translocase 2;ADP/ATP translocase 2, N-terminally processed	Not Significant
NOP16	0.0526239	0.593655	0.636308	Nucleolar protein 16	Not Significant
RPL12	0.0502479	0.704819	0.737106	60S ribosomal protein L12	Not Significant
TUBB4B;TUBB4A	0.0494826	0.642918	0.681661	Tubulin beta-4B chain;Tubulin beta-4A chain	Not Significant
SMARCC2	0.0332896	0.716971	0.745411	SWI/SNF complex subunit SMARCC2	Not Significant
SMARCB1	0.032564	0.736681	0.764306	SWI/SNF-related matrix-associated actin-dependent regulator of chromatin subfamily B member 1	Not Significant
ZNF148	0.0149784	0.92307	0.938141	Zinc finger protein 148	Not Significant
GPATCH4	0.0139535	0.940829	0.952302	G patch domain-containing protein 4	Not Significant
CDC73	0.00927544	0.954522	0.962251	Parafibromin	Not Significant
RPL28	0.00405561	0.967463	0.971364	60S ribosomal protein L28	Not Significant
KTN1	0.00156451	0.98518	0.987162	Kinectin	Not Significant
PGAM5	0.00106435	0.994613	0.994613	Serine/threonine-protein phosphatase PGAM5, mitochondrial	Not Significant
TERF2	-0.00527239	0.950279	0.959917	Telomeric repeat-binding factor 2	Not Significant
DDX21	-0.00859696	0.939087	0.952302	Nucleolar RNA helicase 2	Not Significant
RPLP0;RPLP0P6	-0.0106699	0.963205	0.969043	60S acidic ribosomal protein P0;60S acidic ribosomal protein P0-like	Not Significant
RPL7L1	-0.0154051	0.864911	0.886267	60S ribosomal protein L7-like 1	Not Significant
SAMD1	-0.0181674	0.875224	0.893159	Atherin	Not Significant
GLYR1	-0.0192003	0.816888	0.840517	Putative oxidoreductase GLYR1	Not Significant
RPL32	-0.0318116	0.769976	0.797189	60S ribosomal protein L32	Not Significant
DDX56	-0.0351319	0.87326	0.892984	Probable ATP-dependent RNA helicase DDX56	Not Significant
SMARCA2	-0.0393104	0.707504	0.737106	Probable global transcription activator SNF2L2	Not Significant
RPL10	-0.0439112	0.677578	0.710387	60S ribosomal protein L10	Not Significant
PHF10	-0.0458906	0.823102	0.845164	PHD finger protein 10	Not Significant
SNRPD3	-0.0472828	0.80206	0.826968	Small nuclear ribonucleoprotein Sm D3	Not Significant
HIST2H2BE;HIST1H2BB;HIST1H2BO;HIST1H2BJ;HIST3H2BB	-0.0500055	0.892555	0.908983	Histone H2B type 2-E;Histone H2B type 1-B;Histone H2B type 1-O;Histone H2B type 1-J;Histone H2B type 3-B	Not Significant
SMARCC1	-0.0512401	0.553316	0.596432	SWI/SNF complex subunit SMARCC1	Not Significant
SMARCE1	-0.0556065	0.545133	0.590165	SWI/SNF-related matrix-associated actin-dependent regulator of chromatin subfamily E member 1	Not Significant
ACTL6A	-0.0607963	0.451525	0.495285	Actin-like protein 6A	Not Significant
RPS14	-0.0652889	0.6239	0.663893	40S ribosomal protein S14	Not Significant
MORF4L1	-0.0674897	0.661515	0.696479	Mortality factor 4-like protein 1	Not Significant
NOP58	-0.0779772	0.369101	0.417756	Nucleolar protein 58	Not Significant
RPL23	-0.0803838	0.511298	0.554742	60S ribosomal protein L23	Not Significant
DDX31	-0.0805744	0.388974	0.433354	Probable ATP-dependent RNA helicase DDX31	Not Significant
RPS23	-0.0819357	0.455786	0.497767	40S ribosomal protein S23	Not Significant
PBRM1	-0.083963	0.677333	0.710387	Protein polybromo-1	Not Significant
PPP1CB	-0.0885724	0.658692	0.694976	Serine/threonine-protein phosphatase PP1-beta catalytic subunit	Not Significant
SMARCD2	-0.0945075	0.381194	0.426595	SWI/SNF-related matrix-associated actin-dependent regulator of chromatin subfamily D member 2	Not Significant
PDS5B	-0.0984429	0.37654	0.423289	Sister chromatid cohesion protein PDS5 homolog B	Not Significant
SPATS2L	-0.102103	0.317775	0.366324	SPATS2-like protein	Not Significant
TOP2B	-0.105313	0.312328	0.362563	DNA topoisomerase 2-beta	Not Significant
SNRPN;SNRPB	-0.107514	0.313782	0.363404	Small nuclear ribonucleoprotein-associated protein N;Small nuclear ribonucleoprotein-associated proteins B and B	Not Significant
DDX52	-0.112368	0.192965	0.235531	Probable ATP-dependent RNA helicase DDX52	Not Significant
EIF4A3	-0.112414	0.354052	0.402552	Eukaryotic initiation factor 4A-III;Eukaryotic initiation factor 4A-III, N-terminally processed	Not Significant
RPS4X	-0.11755	0.294779	0.345411	40S ribosomal protein S4, X isoform	Not Significant
LMNA	-0.119918	0.247718	0.295128	Prelamin-A/C;Lamin-A/C	Not Significant
RPL17	-0.123168	0.199176	0.241926	60S ribosomal protein L17	Not Significant
RFC2	-0.126412	0.166613	0.207433	Replication factor C subunit 2	Not Significant
RPS24	-0.131895	0.380394	0.426595	40S ribosomal protein S24	Not Significant
RPS15	-0.13304	0.228665	0.274397	40S ribosomal protein S15	Not Significant
DDX18	-0.135736	0.216633	0.261218	ATP-dependent RNA helicase DDX18	Not Significant
EIF4A1;EIF4A2	-0.13731	0.643334	0.681661	Eukaryotic initiation factor 4A-I;Eukaryotic initiation factor 4A-II;Eukaryotic initiation factor 4A-II, N-terminally processed	Not Significant
LBR	-0.140377	0.308431	0.358875	Lamin-B receptor	Not Significant
RFC3	-0.141479	0.118602	0.151835	Replication factor C subunit 3	Not Significant
NAT10	-0.148507	0.126576	0.161215	N-acetyltransferase 10	Not Significant
NPM1	-0.150518	0.193599	0.235727	Nucleophosmin	Not Significant
FARP1	-0.151393	0.547822	0.591791	FERM, RhoGEF and pleckstrin domain-containing protein 1	Not Significant
NOP56	-0.153564	0.0883293	0.116679	Nucleolar protein 56	Not Significant
HIST1H2BM;HIST1H2BN;HIST1H2BH;HIST2H2BF;HIST1H2BC;HIST1H2BD;HIST1H2BK;HIST1H2BL;H2BFS	-0.162841	0.112795	0.144774	Histone H2B type 1-M;Histone H2B type 1-N;Histone H2B type 1-H;Histone H2B type 2-F;Histone H2B type 1-C/E/F/G/I;Histone H2B type 1-D;Histone H2B type 1-K;Histone H2B type 1-L;Histone H2B type F-S	Not Significant
KRT18	-0.169378	0.225493	0.271245	Keratin, type I cytoskeletal 18	Not Significant
RFC1	-0.17518	0.0696117	0.0955174	Replication factor C subunit 1	Not Significant
TOP2A	-0.175916	0.190292	0.233404	DNA topoisomerase 2-alpha	Not Significant
RFC5	-0.178327	0.075936	0.102206	Replication factor C subunit 5	Not Significant
LYAR	-0.180213	0.238934	0.286031	Cell growth-regulating nucleolar protein	Not Significant
DNTTIP1	-0.181516	0.432248	0.475186	Deoxynucleotidyltransferase terminal-interacting protein 1	Not Significant
RPL35	-0.185589	0.29689	0.347069	60S ribosomal protein L35	Not Significant
RPL15	-0.197801	0.0831278	0.110394	60S ribosomal protein L15	Not Significant
RPL24	-0.198591	0.0732442	0.0996601	60S ribosomal protein L24	Not Significant
HIST1H2AJ;HIST1H2AH;H2AFJ;HIST2H2AC;HIST2H2AA3;HIST1H2AD;HIST1H2AG	-0.206008	0.0415199	0.0608144	Histone H2A type 1-J;Histone H2A type 1-H;Histone H2A.J;Histone H2A type 2-C;Histone H2A type 2-A;Histone H2A type 1-D;Histone H2A type 1	Not Significant
RPS27;RPS27L	-0.208026	0.157755	0.197162	40S ribosomal protein S27;40S ribosomal protein S27-like	Not Significant
TAF9	-0.209474	0.0646751	0.0897165	Transcription initiation factor TFIID subunit 9	Not Significant
NOP2	-0.212205	0.08927	0.11761	Probable 28S rRNA (cytosine(4447)-C(5))-methyltransferase	Not Significant
RPS11	-0.214373	0.138202	0.174681	40S ribosomal protein S11	Not Significant
MKI67	-0.219259	0.325023	0.372096	Antigen KI-67	Not Significant
RFC4	-0.224013	0.0446151	0.0649659	Replication factor C subunit 4	Not Significant
RPS6	-0.227357	0.035567	0.0536739	40S ribosomal protein S6	Not Significant
SMARCD1	-0.235498	0.0743236	0.100307	SWI/SNF-related matrix-associated actin-dependent regulator of chromatin subfamily D member 1	Not Significant
SNW1	-0.238784	0.481562	0.524766	SNW domain-containing protein 1	Not Significant
BRD7	-0.246192	0.0924187	0.121437	Bromodomain-containing protein 7	Not Significant
TAF6	-0.250547	0.0858886	0.113757	Transcription initiation factor TFIID subunit 6	Not Significant
RPS9	-0.263007	0.0802337	0.106835	40S ribosomal protein S9	Not Significant
ARID2	-0.265982	0.186066	0.229119	AT-rich interactive domain-containing protein 2	Not Significant
LLPH	-0.267359	0.0218828	0.0343774	Protein LLP homolog	Not Significant
AHCTF1	-0.267935	0.0179106	0.0295347	Protein ELYS	Not Significant
MAGT1	-0.271135	0.0135812	0.0236483	Magnesium transporter protein 1	Not Significant
RPS3A	-0.271389	0.0328899	0.0500892	40S ribosomal protein S3a	Not Significant
SART1	-0.273369	0.11027	0.141897	U4/U6.U5 tri-snRNP-associated protein 1	Not Significant
H1F0	-0.274813	0.0145299	0.0251247	Histone H1.0;Histone H1.0, N-terminally processed	Not Significant
EMD	-0.274845	0.0696241	0.0955174	Emerin	Not Significant
PDCD11	-0.275216	0.0179006	0.0295347	Protein RRP5 homolog	Not Significant
RPL13	-0.275326	0.0198983	0.0320691	60S ribosomal protein L13	Not Significant
YY1	-0.281344	0.01747	0.0290971	Transcriptional repressor protein YY1	Not Significant
RRP12	-0.281483	0.0136507	0.0236866	RRP12-like protein	Not Significant
PPP1R10	-0.282801	0.0705568	0.096531	Serine/threonine-protein phosphatase 1 regulatory subunit 10	Not Significant
GNL2	-0.288183	0.0110553	0.0198757	Nucleolar GTP-binding protein 2	Not Significant
PTRF	-0.289326	0.0151798	0.0259779	Polymerase I and transcript release factor	Not Significant
RPL26L1	-0.295235	0.0134451	0.0234936	60S ribosomal protein L26-like 1	Not Significant
MPHOSPH10	-0.298591	0.0663166	0.0914838	U3 small nucleolar ribonucleoprotein protein MPP10	Not Significant
MYL6	-0.300503	0.0365834	0.0548539	Myosin light polypeptide 6	Not Significant
CHD3	-0.302118	0.0593601	0.0830374	Chromodomain-helicase-DNA-binding protein 3	Not Significant
TECR	-0.305077	0.0375386	0.0556375	Very-long-chain enoyl-CoA reductase	Not Significant
AATF	-0.308694	0.483633	0.525871	Protein AATF	Not Significant
RPL29	-0.311349	0.0210202	0.0336594	60S ribosomal protein L29	Not Significant
FTSJ3	-0.315301	0.0216765	0.0342875	pre-rRNA processing protein FTSJ3	Not Significant
RRP1B	-0.316745	0.00765128	0.0144871	Ribosomal RNA processing protein 1 homolog B	Not Significant
GTPBP4	-0.317848	0.0603715	0.0842157	Nucleolar GTP-binding protein 1	Not Significant
RPL31	-0.322555	0.0230411	0.0360832	60S ribosomal protein L31	Not Significant
PNN	-0.325541	0.0660283	0.0913392	Pinin	Not Significant
CHCHD3	-0.340872	0.0718211	0.0979916	MICOS complex subunit MIC19	Not Significant
BOP1	-0.342719	0.214638	0.259442	Ribosome biogenesis protein BOP1	Not Significant
EIF6	-0.346109	0.0468288	0.0677928	Eukaryotic translation initiation factor 6	Not Significant
PPAN	-0.346584	0.0146677	0.0252384	Suppressor of SWI4 1 homolog	Not Significant
USP39	-0.346745	0.0382267	0.0564893	U4/U6.U5 tri-snRNP-associated protein 2	Not Significant
RPL27A	-0.349921	0.020053	0.0322142	60S ribosomal protein L27a	Not Significant
DDX27	-0.350162	0.00590665	0.011766	Probable ATP-dependent RNA helicase DDX27	Not Significant
TAF4	-0.354495	0.0169604	0.0284386	Transcription initiation factor TFIID subunit 4	Not Significant
MYL12A;MYL12B;MYL9	-0.357927	0.0368997	0.0548539	Myosin regulatory light chain 12A;Myosin regulatory light chain 12B;Myosin regulatory light polypeptide 9	Not Significant
NIFK	-0.359137	0.00471197	0.00990109	MKI67 FHA domain-interacting nucleolar phosphoprotein	Not Significant
PES1	-0.361857	0.0362954	0.0546075	Pescadillo homolog	Not Significant
SMARCA1	-0.364914	0.0123778	0.0217815	Probable global transcription activator SNF2L1	Not Significant
RPL26	-0.366446	0.00419075	0.00907389	60S ribosomal protein L26	Not Significant
SMARCA5	-0.367303	0.00469174	0.00990109	SWI/SNF-related matrix-associated actin-dependent regulator of chromatin subfamily A member 5	Not Significant
CCDC86	-0.380058	0.00567029	0.0114324	Coiled-coil domain-containing protein 86	Not Significant
CCDC137	-0.383623	0.0450728	0.0654409	Coiled-coil domain-containing protein 137	Not Significant
HADHA	-0.395596	0.0387473	0.0570892	Trifunctional enzyme subunit alpha, mitochondrial;Long-chain enoyl-CoA hydratase;Long chain 3-hydroxyacyl-CoA dehydrogenase	Not Significant
CEBPZ	-0.399996	0.00707282	0.0136522	CCAAT/enhancer-binding protein zeta	Not Significant
TCERG1	-0.404449	0.0268682	0.0415539	Transcription elongation regulator 1	Not Significant
NOLC1	-0.405429	0.0075887	0.0144871	Nucleolar and coiled-body phosphoprotein 1	Not Significant
SLC25A3	-0.407267	0.00868961	0.0159457	Phosphate carrier protein, mitochondrial	Not Significant
SCD	-0.414573	0.00565501	0.0114324	Acyl-CoA desaturase	Not Significant
ACTB	-0.414663	0.00237407	0.00571152	Actin, cytoplasmic 1;Actin, cytoplasmic 1, N-terminally processed	Not Significant
POGZ	-0.418978	0.098643	0.127928	Pogo transposable element with ZNF domain	Not Significant
KIF4A	-0.419787	0.0790781	0.105579	Chromosome-associated kinesin KIF4A	Not Significant
RPL8	-0.422203	0.00533496	0.0108886	60S ribosomal protein L8	Not Significant
MYH9	-0.430419	0.00767992	0.0144871	Myosin-9	Not Significant
LMNB1	-0.430786	0.0265839	0.0412422	Lamin-B1	Not Significant
IMP3	-0.433683	0.0264811	0.0412112	U3 small nucleolar ribonucleoprotein protein IMP3	Not Significant
DDX10	-0.44248	0.00868452	0.0159457	Probable ATP-dependent RNA helicase DDX10	Not Significant
PLCD3	-0.45032	0.0585226	0.082315	1-phosphatidylinositol 4,5-bisphosphate phosphodiesterase delta-3	Not Significant
DMAP1	-0.459395	0.00235831	0.00570117	DNA methyltransferase 1-associated protein 1	Not Significant
HIST1H1A	-0.459402	0.021174	0.0337969	Histone H1.1	Not Significant
RPL27	-0.462156	0.0064881	0.012771	60S ribosomal protein L27	Not Significant
ABCD3	-0.477138	0.0115985	0.0206287	ATP-binding cassette sub-family D member 3	Not Significant
MYH10	-0.478648	0.0216879	0.0342875	Myosin-10	Not Significant
LAS1L	-0.478681	0.013244	0.0232236	Ribosomal biogenesis protein LAS1L	Not Significant
H1FX	-0.48031	0.0039094	0.00850166	Histone H1x	Not Significant
NSA2	-0.487747	0.0233307	0.0364223	Ribosome biogenesis protein NSA2 homolog	Not Significant
RPL10A	-0.488311	0.00281139	0.00648183	60S ribosomal protein L10a	Not Significant
RPS13	-0.506445	0.00497949	0.0102471	40S ribosomal protein S13	Not Significant
BAG2	-0.51143	0.0163673	0.0276303	BAG family molecular chaperone regulator 2	Not Significant
SP140L	-0.516881	0.00368704	0.00812454	Nuclear body protein SP140-like protein	Not Significant
KIAA0020	-0.518398	0.0100511	0.0182017	Pumilio domain-containing protein KIAA0020	Not Significant
HIST1H1B	-0.519044	0.00349488	0.00781234	Histone H1.5	Not Significant
DNAJC9	-0.523284	0.000838152	0.00264177	DnaJ homolog subfamily C member 9	Not Significant
HIST1H1D	-0.523599	0.00500055	0.010248	Histone H1.3	Not Significant
IMMT	-0.5367	0.094086	0.122978	MICOS complex subunit MIC60	Not Significant
HIST1H1C	-0.539462	0.00262653	0.00616987	Histone H1.2	Not Significant
RRP15	-0.545904	0.0065471	0.0127861	RRP15-like protein	Not Significant
MAP1B	-0.552497	0.00116255	0.00332731	Microtubule-associated protein 1B;MAP1B heavy chain;MAP1 light chain LC1	Not Significant
TANK	-0.555812	0.00157693	0.00419953	TRAF family member-associated NF-kappa-B activator	Not Significant
GNL3	-0.559003	0.00175568	0.00453021	Guanine nucleotide-binding protein-like 3	Not Significant
RPL5	-0.560847	0.0183142	0.0299032	60S ribosomal protein L5	Not Significant
WDR5	-0.570923	0.00544213	0.011062	WD repeat-containing protein 5	Not Significant
GLTSCR2	-0.576233	0.00362109	0.00801469	Glioma tumor suppressor candidate region gene 2 protein	Not Significant
MYBBP1A	-0.584488	0.00306055	0.00699153	Myb-binding protein 1A	Not Significant
NOC3L	-0.587037	0.00461917	0.00990109	Nucleolar complex protein 3 homolog	Not Significant
PRKDC	-0.605041	0.00483244	0.0100812	DNA-dependent protein kinase catalytic subunit	Not Significant
REXO4	-0.609611	0.00579706	0.0115941	RNA exonuclease 4	Not Significant
RPL7A	-0.622508	0.00121334	0.00338101	60S ribosomal protein L7a	Not Significant
HIST1H1E	-0.632993	0.00849874	0.0157924	Histone H1.4	Not Significant
RPL18	-0.634891	0.00227941	0.00556444	60S ribosomal protein L18	Not Significant
TEX10	-0.640341	0.000943226	0.00286419	Testis-expressed sequence 10 protein	Not Significant
PRKCDBP	-0.643678	0.000773653	0.00250181	Protein kinase C delta-binding protein	Not Significant
RPL6	-0.646558	0.000519837	0.00186244	60S ribosomal protein L6	Not Significant
NOM1	-0.64708	0.00761462	0.0144871	Nucleolar MIF4G domain-containing protein 1	Not Significant
KRI1	-0.649603	0.000397432	0.0015708	Protein KRI1 homolog	Not Significant
HADHB	-0.651031	0.00870927	0.0159457	Trifunctional enzyme subunit beta, mitochondrial;3-ketoacyl-CoA thiolase	Not Significant
RPN1	-0.655757	0.0629817	0.0876114	Dolichyl-diphosphooligosaccharide--protein glycosyltransferase subunit 1	Not Significant
SDAD1	-0.659988	0.426204	0.469579	Protein SDA1 homolog	Not Significant
RPL14	-0.664315	0.002804	0.00648183	60S ribosomal protein L14	Not Significant
RPL18A	-0.664356	0.00570148	0.0114489	60S ribosomal protein L18a	Not Significant
RPL19	-0.66581	0.000333619	0.00140799	60S ribosomal protein L19	Not Significant
DDX23	-0.668264	0.0114611	0.0204574	Probable ATP-dependent RNA helicase DDX23	Not Significant
RPS8	-0.687269	0.0011238	0.0032583	40S ribosomal protein S8	Not Significant
RPL4	-0.69194	0.00127326	0.00350323	60S ribosomal protein L4	Not Significant
RPL3	-0.696946	0.00157265	0.00419953	60S ribosomal protein L3	Not Significant
BAZ1B	-0.697989	0.000391969	0.0015616	Tyrosine-protein kinase BAZ1B	Not Significant
SNRNP200	-0.70883	0.00112536	0.0032583	U5 small nuclear ribonucleoprotein 200 kDa helicase	Not Significant
SURF6	-0.726765	0.00826092	0.0155243	Surfeit locus protein 6	Not Significant
PRPF6	-0.732306	0.00178604	0.00455117	Pre-mRNA-processing factor 6	Not Significant
CENPV	-0.735176	0.00841939	0.0157036	Centromere protein V	Not Significant
SON	-0.754767	0.00200731	0.00499821	Protein SON	Not Significant
COL5A1	-0.756496	0.036691	0.0548539	Collagen alpha-1(V) chain	Not Significant
SENP3	-0.762339	0.00956997	0.0174573	Sentrin-specific protease 3	Not Significant
DDX24	-0.762606	0.00168214	0.0043859	ATP-dependent RNA helicase DDX24	Not Significant
SMN1	-0.763079	0.00311846	0.00705905	Survival motor neuron protein	Not Significant
NOL9	-0.763757	0.00152151	0.00409575	Polynucleotide 5-hydroxyl-kinase NOL9	Not Significant
PRPF8	-0.764439	0.000780012	0.0025061	Pre-mRNA-processing-splicing factor 8	Not Significant
POP1	-0.767609	0.00109526	0.00320846	Ribonucleases P/MRP protein subunit POP1	Not Significant
SMC1A	-0.768555	0.000489795	0.00178042	Structural maintenance of chromosomes protein 1A	Not Significant
EFTUD2	-0.778011	0.00119454	0.00338001	116 kDa U5 small nuclear ribonucleoprotein component	Not Significant
RRS1	-0.792262	0.00188351	0.0047373	Ribosome biogenesis regulatory protein homolog	Not Significant
MED14	-0.820077	0.315433	0.364468	Mediator of RNA polymerase II transcription subunit 14	Not Significant
PELP1	-0.844286	0.00141744	0.00385729	Proline-, glutamic acid- and leucine-rich protein 1	Not Significant
EP400	-0.844663	0.000691475	0.00225068	E1A-binding protein p400	Not Significant
RSL1D1	-0.847587	0.000844025	0.00264355	Ribosomal L1 domain-containing protein 1	Not Significant
MED1	-0.860772	0.0498646	0.071358	Mediator of RNA polymerase II transcription subunit 1	Not Significant
HP1BP3	-0.870799	7.02e-05	0.00047237	Heterochromatin protein 1-binding protein 3	Not Significant
DDX20	-0.875847	0.00705362	0.0136522	Probable ATP-dependent RNA helicase DDX20	Not Significant
KRR1	-0.883236	0.000970581	0.00291174	KRR1 small subunit processome component homolog	Not Significant
RRBP1	-0.909852	0.00279641	0.00648183	Ribosome-binding protein 1	Not Significant
WDR18	-0.910049	0.000542673	0.00190318	WD repeat-containing protein 18	Not Significant
HS2ST1	-0.933893	0.00765254	0.0144871	Heparan sulfate 2-O-sulfotransferase 1	Not Significant
RPL13A	-0.942461	0.0030887	0.00702362	60S ribosomal protein L13a	Not Significant
RPL7	-0.945907	0.00046609	0.00171935	60S ribosomal protein L7	Not Significant
SNRNP40	-0.950465	0.00186467	0.00471374	U5 small nuclear ribonucleoprotein 40 kDa protein	Not Significant
BRIX1	-0.956879	0.000536686	0.00189553	Ribosome biogenesis protein BRX1 homolog	Not Significant
PRPF4B	-0.967854	0.00175175	0.00453021	Serine/threonine-protein kinase PRP4 homolog	Not Significant
EBNA1BP2	-0.998651	0.000462602	0.00171922	Probable rRNA-processing protein EBP2	Not Significant
RUVBL2	-1.00218	8.35e-05	0.000525938	RuvB-like 2	Not Significant
RPF2	-1.1175	8.1e-05	0.000523897	Ribosome production factor 2 homolog	Not Significant
RUVBL1	-1.13916	4.76e-05	0.000386067	RuvB-like 1	Not Significant
GEMIN4	-1.17788	0.0105672	0.0190669	Gem-associated protein 4	Not Significant
RIF1	-1.32233	9.17e-05	0.000542272	Telomere-associated protein RIF1	Not Significant
EMSY	-1.60494	0.000581398	0.00200358	Protein EMSY	Down
